# Supplementary material for: Pathogen-Specific Impacts of the 2011–2012 La Niña-Associated Floods on Enteric Infections in the MAL-ED Peru Cohort: A Comparative Interrupted Time Series Analysis
Source: MDPI journal article supplement (doi:10.3390/ijerph17020487), 2020-01-12
Supplement: s1 [file s1]

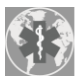

Article

# Pathogen-Specific Impacts of the 2011-12 La Niña-Associated Floods on Enteric Infections in the MAL-ED Peru Cohort: A Comparative Interrupted Time Series Analysis

Josh Colston <sup>1</sup>, Maribel Paredes Olortegui <sup>2</sup>, Benjamin Zaitchik <sup>3</sup>, Pablo Peñataro Yori <sup>4</sup>, Gagandeep Kang <sup>5</sup>, Tahmeed Ahmed <sup>6</sup>, Pascal Bessong <sup>7</sup>, Esto Mduma <sup>8</sup>, Zulfiqar Bhutta <sup>9</sup>, Prakash Sunder Shrestha <sup>10</sup>, Aldo Lima <sup>11</sup> and Margaret Kosek <sup>\*</sup>

<sup>1</sup> Division of Infectious Diseases and International Health, University of Virginia School of Medicine, city, post code, VA, USA josh.colston@virginia.edu

<sup>2</sup> Asociación Benéfica Prisma, Iquitos, post code, Peru, mparedeso@prisma.org.pe

<sup>3</sup> Department of Earth and Planetary Sciences, Johns Hopkins Krieger School of Arts and Sciences, city, post code, MD, USA, zaitchik@jhu.edu

<sup>4</sup> Division of Infectious Diseases and International Health, University of Virginia, Charlottesville, post code, VA, USA, pyori@virginia.edu

<sup>5</sup> Christian Medical College, Vellore, post code, India, gkang@cmcvellore.ac.in

<sup>6</sup> Nutrition & Clinical Services Division, International Centre for Diarrhoeal Disease Research, Bangladesh (icddr), Dhaka, post code, Bangladesh, tahmeed@icddr.org

<sup>7</sup> University of Venda, Thohoyandou, post code, South Africa, Pascal.Bessong@univen.ac.za

<sup>8</sup> Haydom Global Health Institute, Haydom, post code, Tanzania, estomduma@gmail.com

<sup>9</sup> Department of Pediatrics and Child Health, Aga Khan University, Karachi, post code, Pakistan, zulfiqar.bhutta@aku.edu

<sup>10</sup> Department of Child Health, Institute of Medicine of Tribhuvan University, city, post code, Nepal, prakashsunder@hotmail.com

<sup>11</sup> Federal University of Ceará, Fortaleza, post code, Brazil, alima@ufc.br

\* Correspondence: mkosek@virginia.edu;

**Commented [m1]:** Please carefully check the accuracy of names and affiliations.

**Commented [m2]:** Please confirm the Affiliation of Prof. Margaret Kosek.

**Commented [m3]:** Please add city and post code

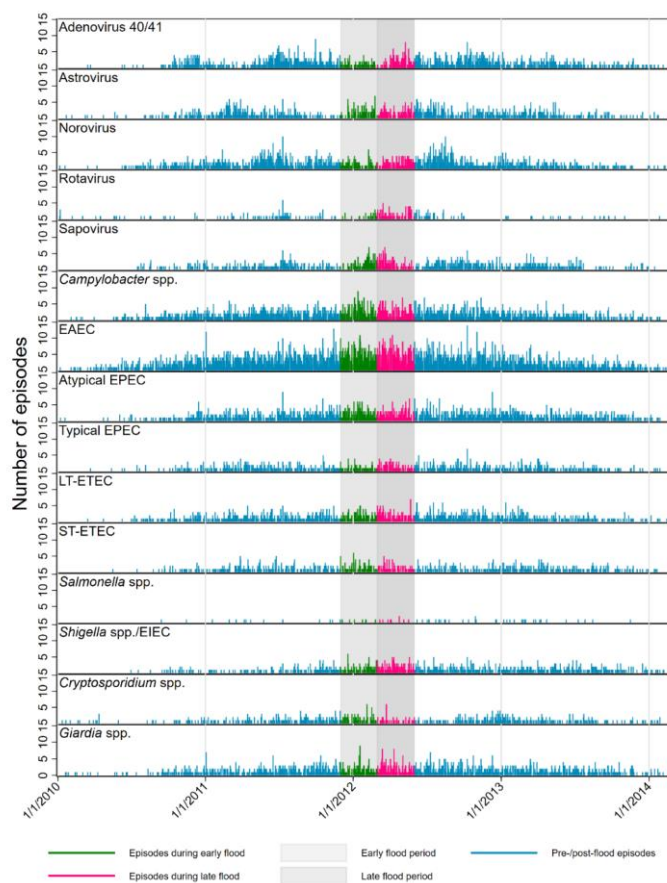

**Figure S1.** Needle plots of the daily distribution of pathogen-positive stool samples recorded at the MAL-ED Peru site by species.

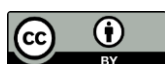

© 2020 by the authors. Submitted for possible open access publication under the terms and conditions of the Creative Commons Attribution (CC BY) license (<http://creativecommons.org/licenses/by/4.0/>).
